# Supplementary material
Source: PubMed Central journal article supplement (PMC4911597)
Supplement: NIHMS769812-supplement-Supplemental_Content_2.pdf [file NIHMS769812-supplement-Supplemental_Content_2.pdf]

## SUPPLEMENTAL DIGITAL CONTENT 2

**TABLE.** Agreement between clustering and experts as quantified by Cohen's kappa for healthy controls.

| <i>Bundle</i> | <i>C vs E<sub>1</sub></i> | <i>C vs E<sub>2</sub></i> | <i>C vs E</i>      | <i>E<sub>1</sub> vs E<sub>2</sub></i> | <i>E<sub>1</sub> (Intra)</i> | <i>E<sub>2</sub> (Intra)</i> | <i>E (Intra)</i> |
|---------------|---------------------------|---------------------------|--------------------|---------------------------------------|------------------------------|------------------------------|------------------|
| <i>IFOF</i>   | 0.70 (0.02)               | 0.61 (0.03)               | <b>0.66</b> (0.05) | <b>0.61</b> (0.08)                    | 0.72 (0.08)                  | 0.49 (0.08)                  | 0.61 (0.14)      |
| <i>ILF</i>    | 0.63 (0.08)               | 0.62 (0.09)               | <b>0.62</b> (0.09) | <b>0.67</b> (0.04)                    | 0.73 (0.13)                  | 0.65 (0.03)                  | 0.69 (0.10)      |
| <i>AF</i>     | 0.60 (0.07)               | 0.68 (0.10)               | <b>0.64</b> (0.10) | <b>0.46</b> (0.16)                    | 0.78 (0.07)                  | 0.78 (0.25)                  | 0.78 (0.18)      |
| <i>UF</i>     | 0.60 (0.13)               | 0.59 (0.14)               | <b>0.60</b> (0.13) | <b>0.89</b> (0.03)                    | 0.94 (0.03)                  | 0.87 (0.04)                  | 0.91 (0.05)      |
| <i>CB</i>     | 0.78 (0.04)               | 0.74 (0.05)               | <b>0.76</b> (0.05) | <b>0.74</b> (0.05)                    | 0.86 (0.02)                  | 0.92 (0.03)                  | 0.89 (0.04)      |
| <i>FR</i>     | 0.59 (0.07)               | 0.63 (0.07)               | <b>0.61</b> (0.07) | <b>0.59</b> (0.04)                    | 0.81 (0.09)                  | 0.85 (0.15)                  | 0.83 (0.12)      |

The standard deviations are given in parentheses. C, clustering; E<sub>1</sub>, expert 1; E<sub>2</sub>, expert 2; E, both experts (average of both). Intra-expert agreement quantifies the variation with the repeated drawings. The overall agreement between clustering and experts (C vs E) is generally higher than the agreement between experts (E<sub>1</sub> vs E<sub>2</sub>).
