# Supplementary material
Source: PubMed Central journal article supplement (PMC4911597)
Supplement: NIHMS769812-supplement-Supplemental_Content_3.pdf [file NIHMS769812-supplement-Supplemental_Content_3.pdf]

### SUPPLEMENTAL DIGITAL CONTENT 3

**TABLE.** Mean percent differences in FA values for healthy controls.

| <i>Bundle</i>      | <i>C vs E<sub>1</sub></i> | <i>C vs E<sub>2</sub></i> | <i>C vs E</i>      | <i>E<sub>1</sub> vs E<sub>2</sub></i> | <i>E<sub>1</sub> (Intra)</i> | <i>E<sub>2</sub> (Intra)</i> | <i>E (Intra)</i> |
|--------------------|---------------------------|---------------------------|--------------------|---------------------------------------|------------------------------|------------------------------|------------------|
| <b><i>I</i>FOF</b> | 3.26 (0.70)               | 3.90 (1.11)               | <b>3.58</b> (0.98) | <b>5.16</b> (1.18)                    | 4.65 (1.03)                  | 7.32 (1.47)                  | 5.98 (1.84)      |
| <b><i>I</i>LF</b>  | 2.58 (1.68)               | 1.50 (0.36)               | <b>2.04</b> (1.33) | <b>2.70</b> (0.82)                    | 1.89 (0.28)                  | 2.36 (0.31)                  | 2.12 (0.38)      |
| <b><i>A</i>F</b>   | 3.58 (1.63)               | 1.95 (0.82)               | <b>2.76</b> (1.53) | <b>4.28</b> (2.30)                    | 0.80 (0.30)                  | 1.17 (0.37)                  | 0.98 (0.39)      |
| <b><i>U</i>F</b>   | 3.46 (2.47)               | 2.51 (1.66)               | <b>2.98</b> (2.16) | <b>2.00</b> (1.30)                    | 1.17 (1.06)                  | 2.03 (1.17)                  | 1.60 (1.20)      |
| <b><i>C</i>B</b>   | 1.16 (0.30)               | 1.41 (0.58)               | <b>1.29</b> (0.48) | <b>0.64</b> (0.14)                    | 1.00 (0.14)                  | 0.33 (0.06)                  | 0.66 (0.35)      |
| <b><i>F</i>R</b>   | 1.67 (0.44)               | 1.25 (0.68)               | <b>1.46</b> (0.61) | <b>2.39</b> (0.17)                    | 1.76 (1.60)                  | 1.47 (1.54)                  | 1.62 (1.58)      |

The standard deviations are given in parentheses. C, clustering; E<sub>1</sub>, expert 1; E<sub>2</sub>, expert 2; E, both experts (average of both). Intra-expert agreements quantify the difference between the repeated drawings. The overall difference between clustering and experts (C vs E) is comparable to the difference between experts (E<sub>1</sub> vs E<sub>2</sub>).
