# Supplementary material
Source: PubMed Central journal article supplement (PMC4911597)
Supplement: NIHMS769812-supplement-Supplemental_Content_4.pdf [file NIHMS769812-supplement-Supplemental_Content_4.pdf]

## SUPPLEMENTAL DIGITAL CONTENT 4

**TABLE.** Agreement between clustering and experts as quantified by Cohen's kappa for patients with brain tumors.

| <i>Bundle</i> | <i>C vs E<sub>1</sub></i> | <i>C vs E<sub>2</sub></i> | <i>C vs E</i>      | <i>E<sub>1</sub> vs E<sub>2</sub></i> |
|---------------|---------------------------|---------------------------|--------------------|---------------------------------------|
| <i>IFO</i>    | 0.58 (0.22)               | 0.40 (0.16)               | <b>0.49</b> (0.21) | <b>0.42</b> (0.22)                    |
| <i>ILF</i>    | 0.58 (0.22)               | 0.60 (0.08)               | <b>0.59</b> (0.17) | <b>0.55</b> (0.20)                    |
| <i>AF</i>     | 0.37 (0.18)               | 0.56 (0.18)               | <b>0.46</b> (0.21) | <b>0.49</b> (0.19)                    |

The standard deviations are given in parentheses. C, clustering; E<sub>1</sub>, expert 1; E<sub>2</sub>, expert 2; E, both experts (average of both). Intra-expert agreement quantifies the variation with the repeated drawings. The overall agreement between clustering and experts (C vs E) is generally higher than the agreement between experts (E<sub>1</sub> vs E<sub>2</sub>).
