# Supplementary material
Source: PubMed Central journal article supplement (PMC4911597)
Supplement: NIHMS769812-supplement-Supplemental_Content_5.pdf [file NIHMS769812-supplement-Supplemental_Content_5.pdf]

## SUPPLEMENTAL DIGITAL CONTENT 5

**TABLE.** Mean percent differences in FA values for patients with brain tumors.

| <i>Bundle</i> | <i>C vs E<sub>1</sub></i> | <i>C vs E<sub>2</sub></i> | <i>C vs E</i>      | <i>E<sub>1</sub> vs E<sub>2</sub></i> |
|---------------|---------------------------|---------------------------|--------------------|---------------------------------------|
| <i>IFO</i>    | 4.19 (4.60)               | 7.95 (4.20)               | <b>6.07</b> (4.79) | <b>8.37</b> (8.15)                    |
| <i>ILF</i>    | 5.47 (5.95)               | 3.26 (1.82)               | <b>4.36</b> (4.54) | <b>6.80</b> (5.90)                    |
| <i>AF</i>     | 7.01 (4.78)               | 4.52 (2.23)               | <b>5.85</b> (4.01) | <b>6.42</b> (5.42)                    |

The standard deviations are given in parentheses. C, clustering; E<sub>1</sub>, expert 1; E<sub>2</sub>, expert 2; E, both experts (average of both). Intra-expert agreements quantify the difference between the repeated drawings. The overall difference between clustering and experts (C vs E) is less than the difference between experts (E<sub>1</sub> vs E<sub>2</sub>).
